# Supplementary material for: A new oxygen reduction electrocatalyst of barium lanthanide cobaltate for composite cathodes of proton-conducting ceramic fuel cells
Source: Royal Society of Chemistry journal article supplement (doi:10.1039/c8ta04093a), 2018-01-01
Supplement: c8ta04093a1.pdf [file c8ta04093a1.pdf]

## Electronic Supplementary Information

### **A new oxygen reduction electrocatalyst of barium lanthanide cobaltate for composite cathodes of proton-conducting ceramic fuel cells**

Toshiaki Matsui <sup>a), \*</sup>, Kohei Manriki <sup>a)</sup>, Kazunari Miyazaki <sup>a)</sup>, Hiroki Muroyama <sup>a)</sup>, and  
Koichi Eguchi <sup>a)</sup>

a) Department of Energy and Hydrocarbon Chemistry, Graduate School of Engineering,  
Kyoto University, Nishikyo-ku, Kyoto 615-8510, Japan

\* Correspondence should be addressed to

Toshiaki Matsui

Department of Energy and Hydrocarbon Chemistry,

Graduate School of Engineering, Kyoto University,

Nishikyo-ku, Kyoto 615-8510, JAPAN

TEL: +81-75-383-7060, FAX: +81-75-383-2520

E-mail: matsui@elech.kuic.kyoto-u.ac.jp

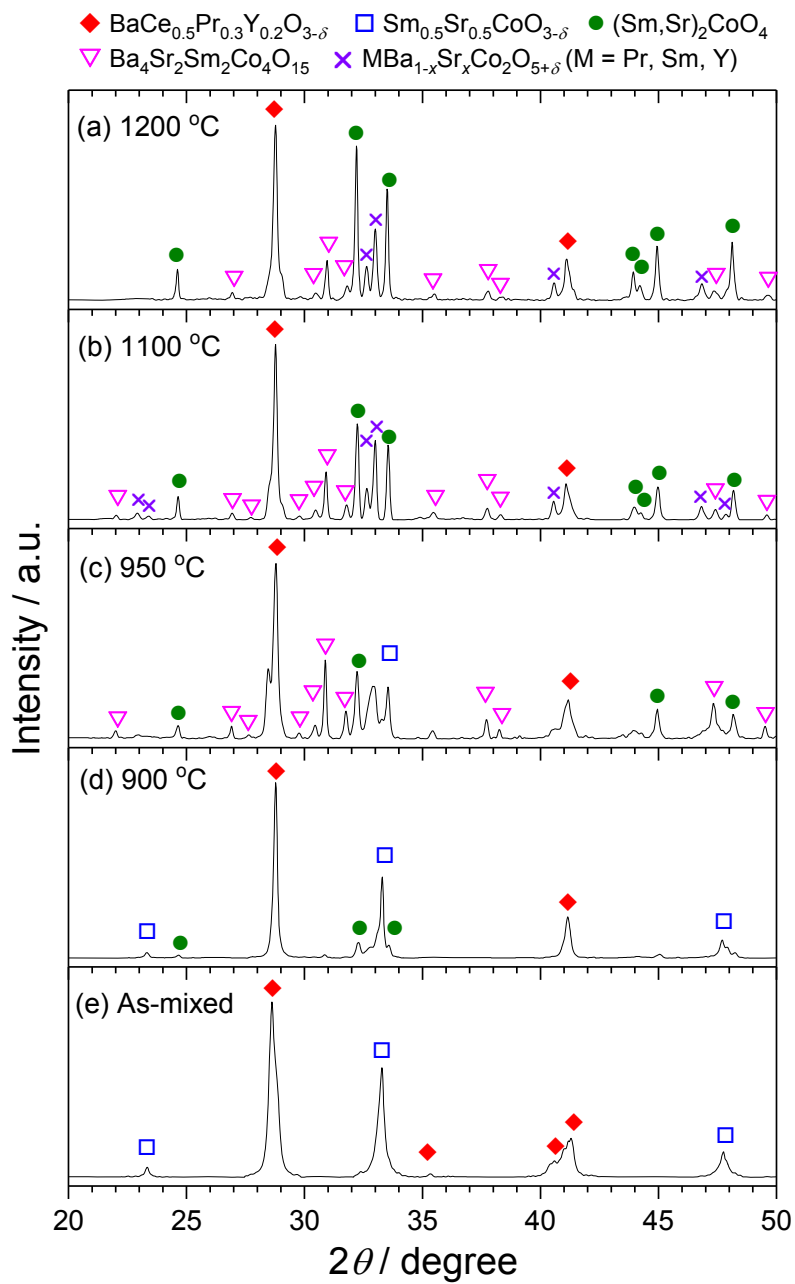

Fig. S1 XRD patterns of SSC113-BCPY (SSC113:BCPY = 50:50 wt.%) as-mixed and calcined at 900–1200 °C for 5 h in air.

Fig. S1 T. Matsui et al.

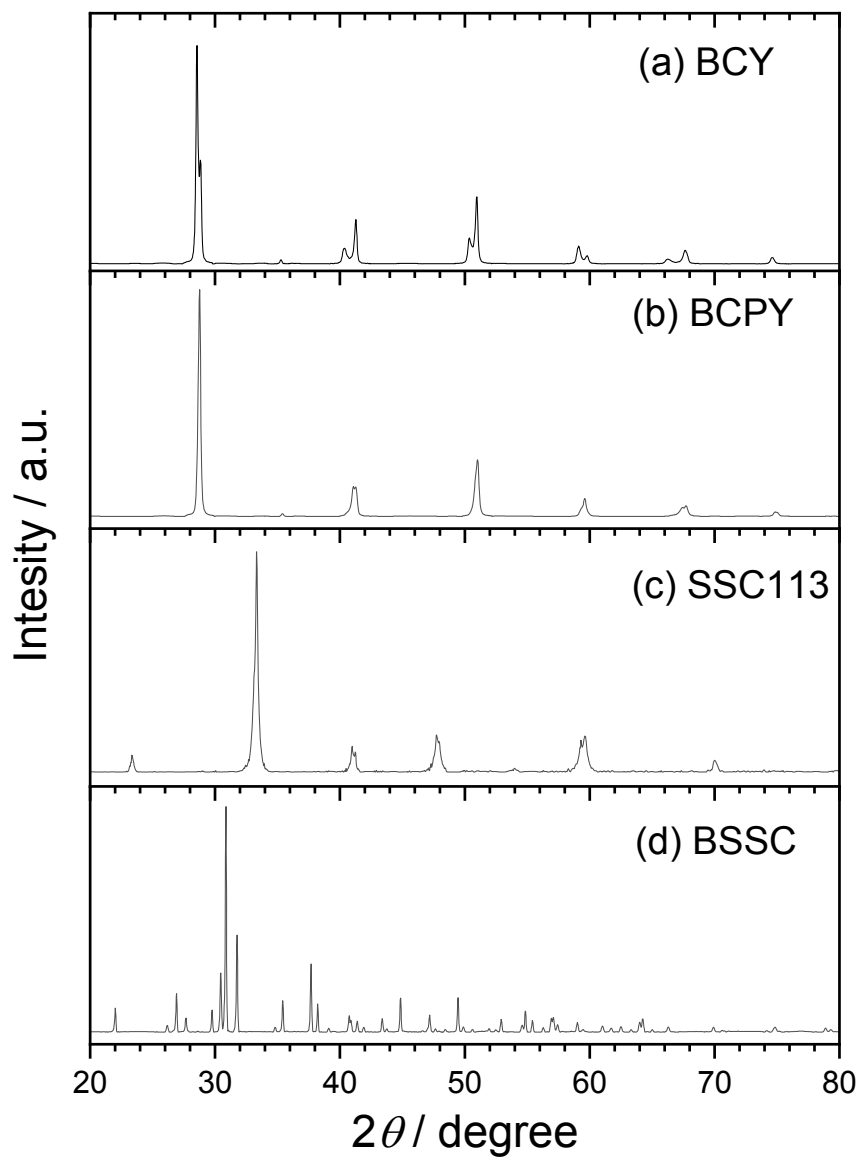

Fig. S2 XRD patterns of as-prepared (a) BCY, (b) BCPY, (c) SSC113, and (d) BSSC.

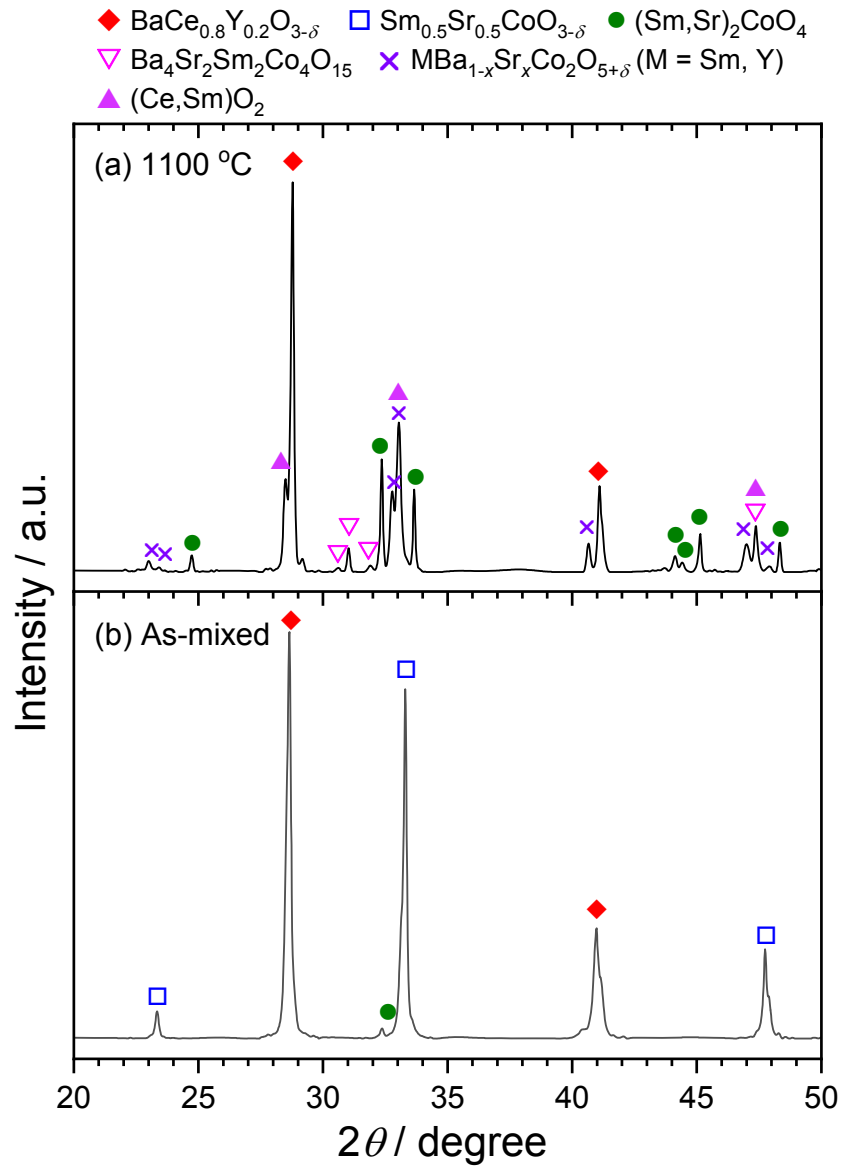

Fig. S3 XRD patterns of SSC113-BCY (SSC113:BCY = 50:50 wt.%) as-mixed and calcined at 1100 °C for 5 h in air.

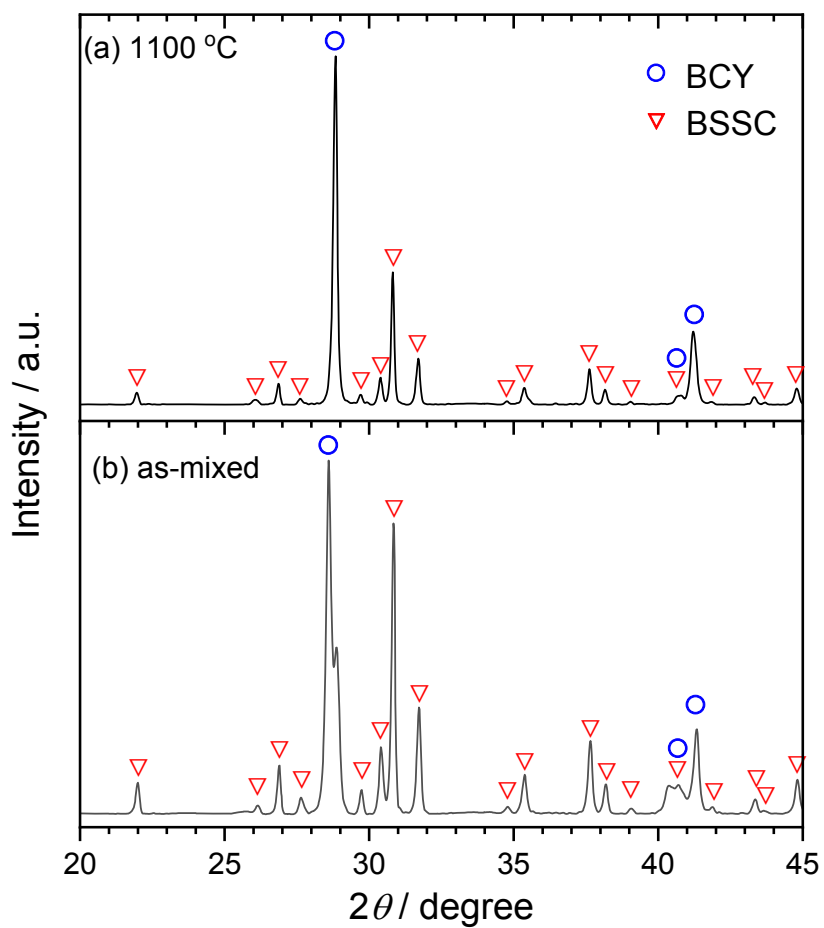

Fig. S4 XRD patterns of BSSC–BCY (BSSC:BCY = 50:50 wt.%) as–mixed and calcined at 1100 °C for 5 h in air.

Fig. S4 T. Matsui et al.

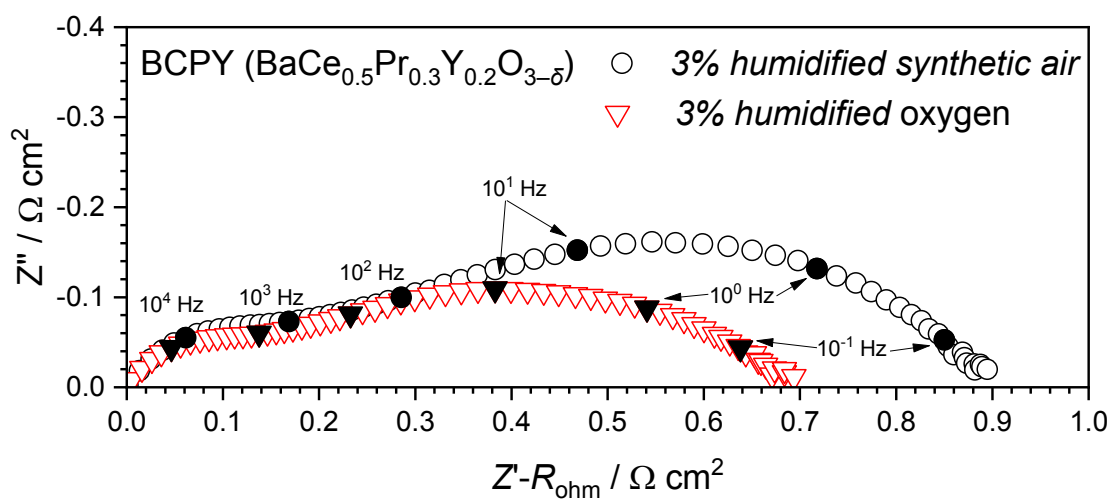

Fig. S5 Impedance spectra of BCPY electrodes at 600 °C in 3% humidified synthetic air and oxygen. Firing temperature of electrode; 1100 °C.

Fig. S5 T. Matsui et al.

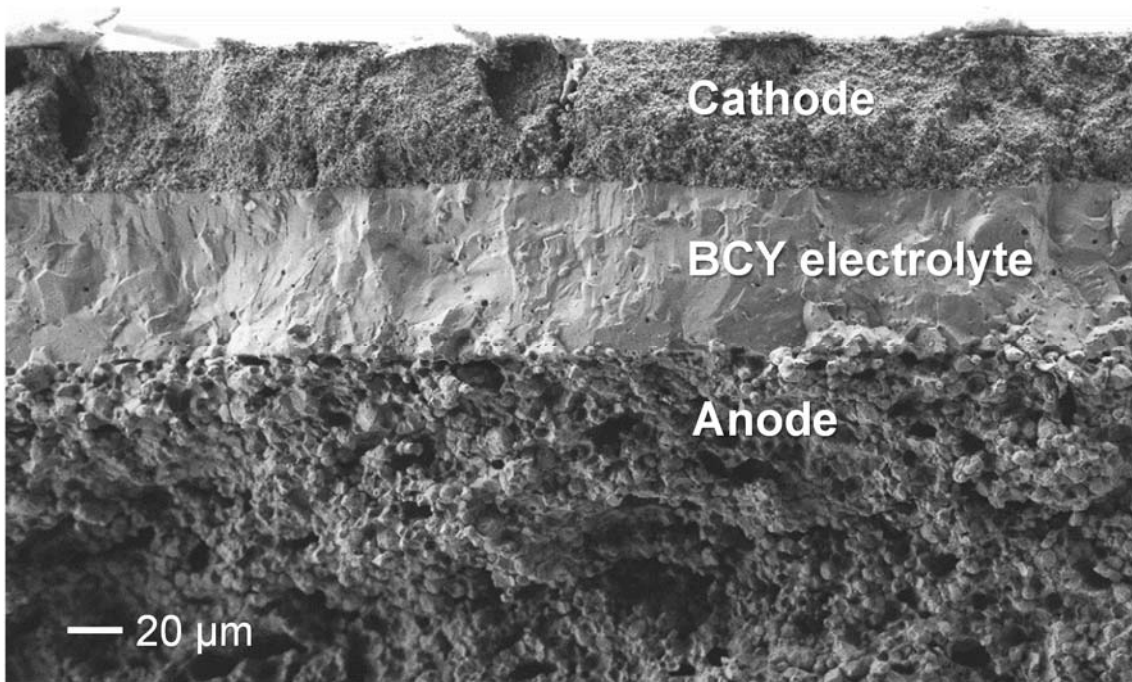

Fig. S6 Cross-sectional SE image of the anode-supported cell (Ni-BCY|BCY|BSSC-BCPY (30:70 wt.%)).

Fig. S6 T. Matsui et al.
